# Supplementary material
Source: publisher site journal article supplement (https://www.dovepress.com/article/278777)
Supplement: Supplementary file 1 [file get_supplementary_file.php]

**Supplementary Table S1.**

Tumour thrombosis classification

1. Classification systems for portal vein tumour thrombosis

1).Vp classification

*i*) Vp0 Absence of portal vein tumour thrombus

*ii*) Vp1 Tumour thrombus distal but not in second-order branches of the main portal vein

*iii*) Vp2 Tumour thrombus in second-order branches

*iv*) Vp3 Tumour thrombus in first-order branches

*v*) Vp4 Tumour thrombus in the main trunk, contralateral to the trunk, or both

Vp = portal vein invasion.

2).Cheng’s classification

*i*) Type I Tumour thrombus in the segmental branches or below

*ii*) Type II Tumour thrombus involving the left or right branch

*iii*)Type III Tumour thrombus involving the main trunk

*v*) Type IV Tumour thrombus involving the superior mesenteric vein

2. Classification systems for bile duct tumour thrombosis (BDTT)

Ueda’s classification

*i)* type I: BDTT located in the secondary branch of the bile duct tree;

*ii)* type II: BDTT extending to the first branch of the bile duct tree;

*iii)* type IIIa: BDTT extending to the common hepatic duct; type IIIb: an implanted tumor growing in the CBD

*iv)* type IV: floating tumor debris from the ruptured tumor in CBD .

**Supplementary Table S2.** **Extent of surgical resection for HCC patients with PVTT or BDTT**

|  | Tumor thrombosis (n=60) | | |  |
| --- | --- | --- | --- | --- |
| Hepatectomy | BDTT (n=12) | | PVTT (n=48) | Total（%） |
| Anatomical hepatectomy | 7 | 30 | | 37（61.7%） |
| Right hemihepatectomy | 1 | 8 | | 6（10.0%） |
| Left hemihepatectomy | 2 | 7 | | 12（20.0%） |
| Posterior sectionectomy | 1 | 2 | | 3（ 5.0%） |
| Anterior sectionectomy | 0 | 5 | | 5（ 8.3%） |
| Lateral sectionectomy | 2 | 2 | | 4（ 6.7%） |
| Central bisectionectomy | 0 | 3 | | 3（ 5.0%） |
| Single segmentectomy | 1 | 2 | | 3（ 5.0%） |
| Segment 5–6 bisegmentectomy | 0 | 1 | | 1（ 1.7%） |
| Non-anatomical hepatectomy | 5 | 18 | | 23（38.3%） |
| Partial hepatectomy | 5 | 18 | | 23（38.3%） |
|  |  |  | |  |

**Note：PVTT： Portal vein tumor thrombus；BDTT: Bile duct tumor thrombus**
